# Supplementary material for: Venous thromboembolism among Medicare acute ischaemic stroke patients with and without COVID-19
Source: PubMed Central journal article supplement — Stroke Vasc Neurol. 2022 Nov 15;8(3):259–62. doi: 10.1136/svn-2022-001814 (PMC10359775; doi:10.1136/svn-2022-001814), 2022-11-15
Supplement: svn-2022-001814supp001.pdf [file svn-2022-001814supp001.pdf]

SUPPLEMENTAL TABLE. Demographic of acute ischaemic stroke patients admitted to hospitals by COVID-19 status among Medicare FFS beneficiaries aged  $\geq 65$  years - United States, 2020-2022

| Variables                                | Overall n (%)<br>or statistics<br>(N=283034) | Hospitalised<br>COVID-19<br>(n=13873) | Non-<br>hospitalised<br>COVID-19<br>(n=12897) | No diagnosis<br>of COVID<br>(n=256264) | P-value* |
|------------------------------------------|----------------------------------------------|---------------------------------------|-----------------------------------------------|----------------------------------------|----------|
| <b>Age at AIS</b>                        |                                              |                                       |                                               |                                        |          |
| Median                                   | 79.5                                         | 80.1                                  | 79.7                                          | 79.4                                   | <0.001   |
| Interquartile range (IQR)                | 73.0-86.3                                    | 73.4-86.8                             | 73.3-86.7                                     | 72.9-86.2                              |          |
| Mean (SE)                                | 79.9 (0.02)                                  | 80.4 (0.07)                           | 80.2 (0.08)                                   | 79.9 (0.02)                            | <0.001   |
| <b>Age in groups</b>                     |                                              |                                       |                                               |                                        |          |
| 65-74                                    | 93060 (32.9)                                 | 4289 (30.9)                           | 4119 (31.9)                                   | 84652 (33.0)                           |          |
| 75-84                                    | 106608 (37.7)                                | 5169 (37.3)                           | 4806 (37.3)                                   | 96633 (37.7)                           |          |
| 85+                                      | 83366 (29.5)                                 | 4415 (31.8)                           | 3972 (30.8)                                   | 74979 (29.3)                           | <0.001   |
| <b>Male</b>                              | 125356 (44.3)                                | 6003 (43.3)                           | 5497 (42.6)                                   | 113856 (44.4)                          | <0.001   |
| <b>Race/ethnicity</b>                    |                                              |                                       |                                               |                                        |          |
| Non-Hispanic white                       | 230539 (81.5)                                | 10341 (74.5)                          | 10461 (81.1)                                  | 209737 (81.8)                          |          |
| Non-Hispanic black                       | 27673 (9.8)                                  | 1914 (13.8)                           | 1166 (9.0)                                    | 24593 (9.6)                            |          |
| Hispanic                                 | 13702 (4.8)                                  | 1090 (7.9)                            | 787 (6.1)                                     | 11825 (4.6)                            |          |
| Other race                               | 11120 (3.9)                                  | 528 (3.8)                             | 483 (3.7)                                     | 10109 (3.9)                            | <0.001   |
| <b>NIHSS in groups<sup>§</sup></b>       |                                              |                                       |                                               |                                        |          |
| 0-9                                      | 214259 (75.7)                                | 8726 (62.9)                           | 9234 (71.6)                                   | 196298 (76.6)                          |          |
| 10-19                                    | 43157 (15.2)                                 | 3024 (21.8)                           | 2205 (17.1)                                   | 37927 (14.8)                           |          |
| 20+                                      | 25619 (9.1)                                  | 2123 (15.3)                           | 1457 (11.3)                                   | 22039 (8.6)                            | <0.001   |
| <b>VTE</b>                               | 7705 (2.7)                                   | 626 (15.3)                            | 382 (11.5)                                    | 6697 (2.6)                             | <0.001   |
| <b>Death by the end of 30 April 2022</b> | 88828 (31.4)                                 | 5684 (41.0)                           | 4117 (31.9)                                   | 79027 (30.8)                           | <0.001   |
| <b>Medical history</b>                   |                                              |                                       |                                               |                                        |          |
| Stroke/TIA                               | 80892 (28.6)                                 | 4621 (33.3)                           | 4032 (31.3)                                   | 72239 (28.2)                           | <0.001   |
| Ischaemic heart disease                  | 157824 (55.8)                                | 8636 (62.3)                           | 8018 (62.2)                                   | 141170 (55.1)                          | <0.001   |
| Hypertension                             | 241310 (85.3)                                | 12280 (88.5)                          | 11364 (88.1)                                  | 217666 (84.9)                          | <0.001   |
| Hypercholesterolemia                     | 229510 (81.1)                                | 11521 (83.0)                          | 10942 (84.8)                                  | 207047 (80.8)                          | <0.001   |
| Diabetes                                 | 128213 (45.3)                                | 7548 (54.4)                           | 6640 (51.5)                                   | 114025 (44.5)                          | <0.001   |
| Atrial fibrillation                      | 66618 (23.5)                                 | 3687 (26.6)                           | 3403 (26.4)                                   | 59528 (23.2)                           | <0.001   |
| Heart Failure                            | 96385 (34.1)                                 | 5959 (43.0)                           | 5231 (40.6)                                   | 85195 (33.2)                           | <0.001   |
| Chronic kidney disease                   | 132927 (47.0)                                | 7791 (56.2)                           | 6676 (51.8)                                   | 118460 (46.2)                          | <0.001   |
| Acute myocardial infarction              | 22375 (7.9)                                  | 1292 (9.3)                            | 1064 (8.2)                                    | 20019 (7.8)                            | <0.001   |
| Peripheral vascular disease              | 56359 (19.9)                                 | 3773 (27.2)                           | 3382 (26.2)                                   | 49204 (19.2)                           | <0.001   |
| Chronic obstructive pulmonary disease    | 83591 (29.5)                                 | 4965 (35.8)                           | 4487 (34.8)                                   | 74139 (28.9)                           | <0.001   |
| Tobacco use                              | 26139 (9.2)                                  | 1242 (9.0)                            | 1046 (8.1)                                    | 23851 (9.3)                            | <0.001   |

Abbreviation: AIS, acute ischaemic stroke; NIHSS, National Institutes of Health Stroke Scale; VTE, Venous thromboembolism; TIA, Transient ischaemic attack

\*P-value comparing the difference in mean, median or proportion across 3 groups of COVID-19 status among the Medicare FFS beneficiaries hospitalised with AIS.

<sup>§</sup> NIHSS scores were based on ICD-10 codes in Medicare database. About 37% of AIS patients had missing NIHSS scores, and we used the multiple imputation techniques as in PROC MI in SAS to impute the missing NIHSS scores.
